# Supplementary material
Source: PubMed Central journal article supplement (PMC2518248)
Supplement: tpc.108.060848_1.pdf [file tpc.108.060848_1.pdf]

Kanaoka, Pillitteri, Fujii, Yoshida, Bogenschutz, Takabayashi, Zhu, and Torii (2008)  
SCRM/ICE1 and SCRM2 specify three cell-state transitional steps leading to Arabidopsis stomatal differentiation

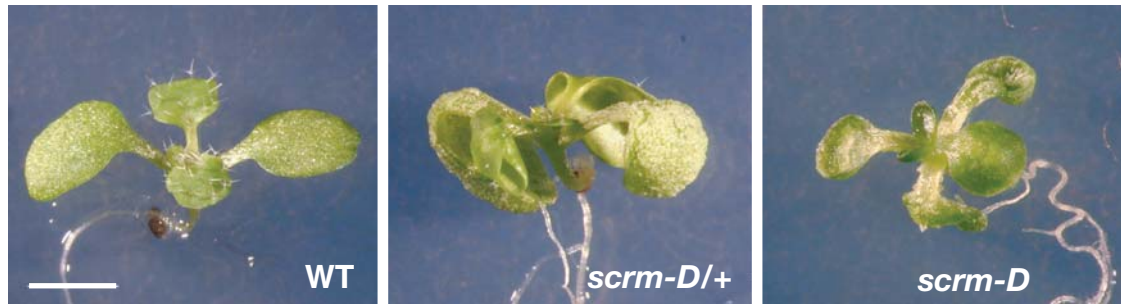

**Supplemental Fig. 1.** Seedling phenotypes of *scrm-D/+* and *scrm-D*. Shown are ten-day-old seedlings of wild type (WT: left), *scrm-D/+* (middle), and *scrm-D* (right). Compared to the wild type, cotyledons and rosette leaves of *scrm-D/+* and *scrm-D* are wrinkled and disintegrated. *scrm-D/+* rosette leaves produce reduced numbers of trichomes, and *scrm-D* does not produce any trichomes: excessive stomatal differentiation occurs in the expense of trichome development. Images are taken under the same magnifications. Scale bar, 2 mm.

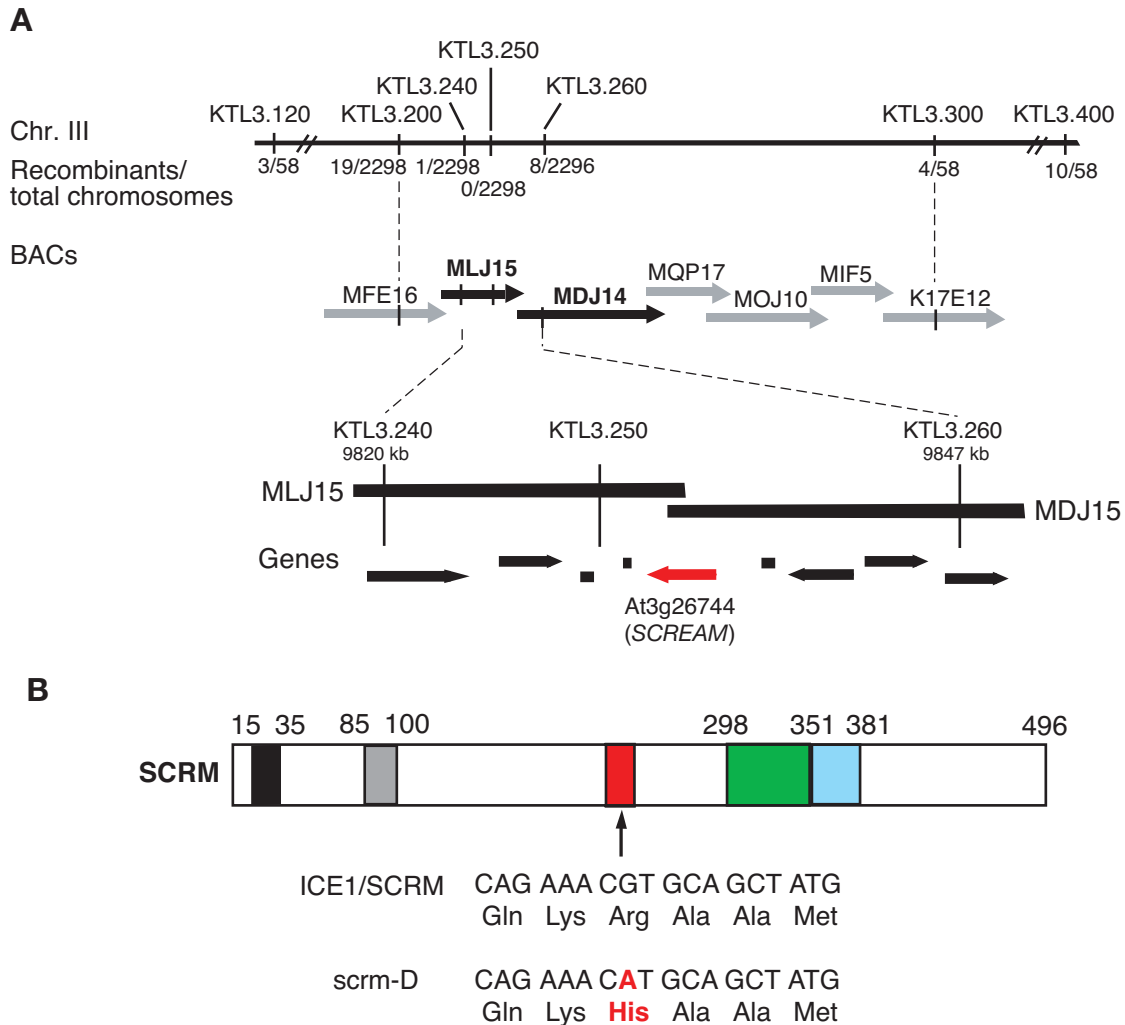

### Supplemental Figure 2. Map-based cloning of *SCRM*

(A) Physical mapping. The locations of molecular markers (SSLP markers, KTL3.120, KTL3.200, KTL3.250, KTL3.300 and KTL3.400; CAPS markers, KTL3.230 and 3.260), the number of recombinants and chromosomes, and the corresponding BAC clone are indicated. Open reading frames within the 27 kb interval are shown at the bottom. *SCRM* encodes At3g26744 (red). (B) Domain structure of *SCRM* protein and the point mutation in *scrm-D*. An acidic domain (black), a serine-rich domain (gray), a KRAAM motif (red), a bHLH domain (green) and a zipper region (light blue) are shown. The arginine at amino-acid 236 is replaced with histidine in *scrm-D* mutant (arrow).

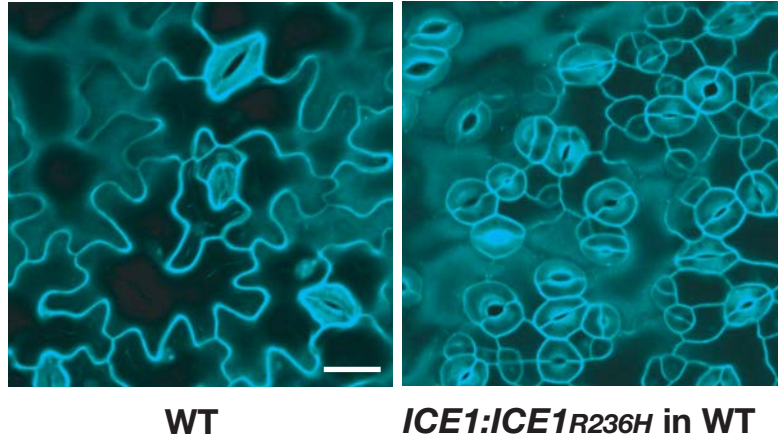

**Supplemental Figure 3.** Recapitulation of *scrm-D* phenotype by introduction of *ICE1:CE1<sub>R236H</sub>* to wild-type plants.

(Left) Abaxial rosette leaf epidermis of wild-type (WT). (Right) Abaxial rosette leaf epidermis of a transgenic plant expressing *ICE1:ICE1<sub>R236H</sub>*. Images are taken under the same magnification. Scale bar, 20  $\mu\text{m}$ .

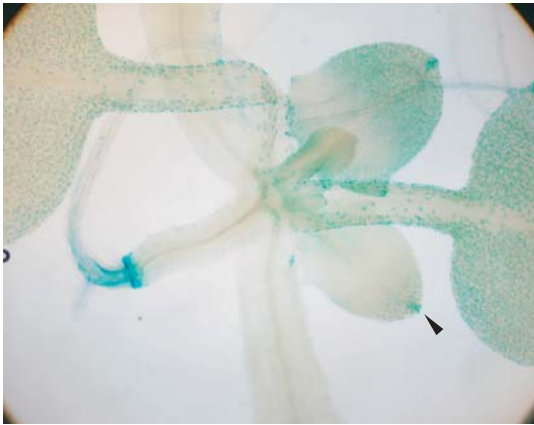

***ICE1:GUS* in WT**

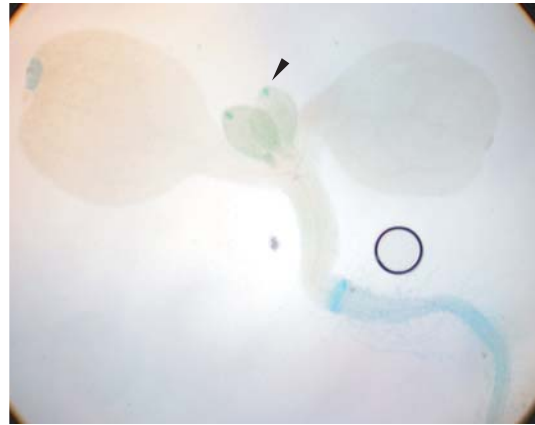

***ICE1:GUS* in *spch***

**Supplemental Figure 4** Effects of *spch* on *ICE1:GUS* expression in non-stomatal cells/tissues. (Left) *ICE1:GUS* in wild-type seedling. (Right) *ICE1:GUS* in *spch* seedling. While *ICE1:GUS* activity in leaf epidermis is abolished, it is detected in roots and hydathodes (arrowhead) in the *spch* mutant seedling.

**A**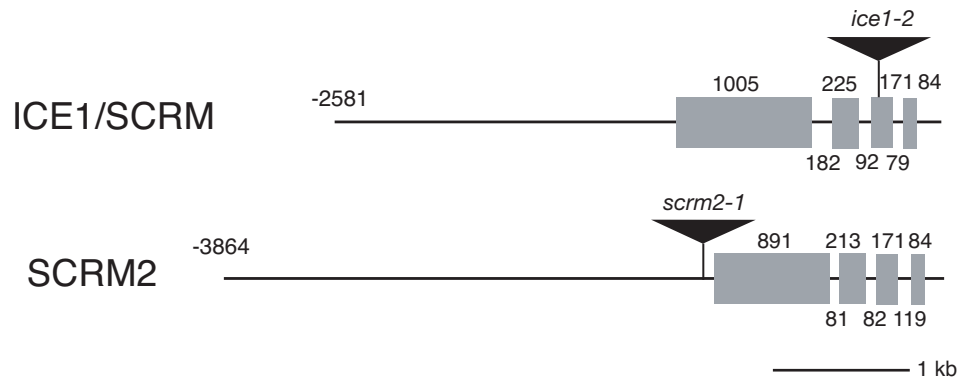

**Supplemental Figure 5.** Structure of *ICE1* and *SCRM2* genes, and *SCRM2* mRNA and amino-acid sequence. (A) Structure of *ICE1* and *SCRM2* genes. Lines, non-coding regions (5' promoter region and introns); Grey boxes, exons. The size of each exon and intron is indicated. The locations of T-DNA insertions in *ice1-2* and *scrm2-1* are indicated. Next page: (B) Full-length cDNA and amino-acid sequence of *SCRM2*. The major (black) and minor (grey) transcripts start at 71 and 135 bp upstream of a translation initiation site (bold), respectively. The 5' end of *SCRM2* mRNA was determined by 5' RACE PCR. (C) Nucleotide sequence of the 5' end of *scrm2-1* mRNA and a potential open reading frame. The *scrm2-1* mRNA contains a chimeric 5' untranslated region (UTR), with an upstream, 136 bp sequence derived from T-DNA (red) preceding the 49 bp *SCRM2* 5' UTR (black). The T-DNA-derived transcripts codes for a short open-reading frame (red).

# B

-135 ACGCCTCCTTTCAAG  
AAAAATCTCTCTCTATATTATCTACGTTTCTCTCGCCTTGTCTCCTTTT **GAGGTTCCATT** (-71)  
TCTACTTCTCTCCAAAATTCGAAACTTTTCCACTCTCTCTCTCTCTACTAGTTTGAC  
+1 **ATGAACAGCGACGGTGTGGCTTGACGGCTCCGGTGAATCTCCGGAAGTTAATAACGGT** +20  
M N S D G V W L D G S G E S P E V N N G  
GAAGCTGCGTCTTGGGTGAGAAACCCAGATGAAGACTGGTTCAATAACCCACCACCACCA  
E A A S W V R N P D E D W F N N P P P  
+121 CAACACACTAATCAAAAACGACTTCAGATTCAATGGTGGCTTTCCTTTAAACCCCTCAGAG +60  
Q H T N Q N D F R F N G G F P L N P S E  
AATCTGCTTCTTCTTCTCAGCAATCGATTGATTCTTCTTCTTCTTCTTCTCCGTTATTA  
N L L L L L Q Q S I D S S S S S P L L  
+241 CATCCTTTACACTCGACGCTGCTTCACAGCAACAACAACAACAACAACAACAGGAA +100  
H P F T L D A A S Q Q Q Q Q Q Q Q Q E  
CAGTCTTTCTTAGCTACGAAAGCTTGTATAGTTTCTTCTCAACGTCCCAACCATCAAT  
Q S F L A T K A C I V S L L N V P T I N  
+361 AACAACACTTTTCGATGACTTCGGCTTTGACTCTGGTTTCTTAGGACAACAATCCATGGA +140  
N N T F D D F G F D S G F L G Q Q F H G  
AATCATCAATCTCCGAACTCGATGAATTTCACTGGCTTAAACCACTCAGTACCGGATTTT  
N H Q S P N S M N F T G L N H S V P D F  
+481 CTTCCAGCTCCGAAAAACAGCTCAGGATCATGTGGATTGAGTCTCTGTTCTCAAACAGA +180  
L P A P E N S S G S C G L S P L F S N R  
GCAAAGGTTTTAAAACCGTTACAGGTAATGGCTTCATCTGGCTCGCAGCCAACCTCTGTTT  
A K V L K P L Q V M A S S G S Q P T L F  
+601 CAGAAACGAGCTGCAATGCGTTCAGAGCTCGAGTAGCAAAATGTGCAATTCTGAGAGTTCT +220  
Q K R A A M R Q S S S S K M C N S E S S  
TCTGAAATGAGGAAATCGAGCTACGAGAGAGATTGACGATACTAGTACCGGAATCATC  
S E M R K S S Y E R E I D D T S T G I I  
+721 GATATCTCTGGATTGAATTACGAATCTGATGACCATAATACTAATAACAACAAGGTAAG +260  
D I S G L N Y E S D D H N T N N N K G K  
AAGAAAGGAATGCCTGCAAAGAATCTTATGGCTGAGAGAAGAAGAAGGAAGAAGCTTAAT  
K K G M P A K N L M A E R R R R K K L N  
+841 GATAGGCTTTACATGCTTAGATCAGTTGTTCCCAAGATCAGCAAAATGGATAGAGCATCA +300  
D R L Y M L R S V V P K I S K M D R A S  
ATACTGGAGATGCTATTGATTACCTCAAAGAGCTTTTCAAAGAATCAACGATCTTCAC  
I L T G D A I D Y L K E L L Q R I N D L H  
+961 ACCGAACTTGAATCTACTCCACCGAGTTCTTCAAGCTTGCATCCGTTAACACCGACTCCA +340  
T E L E S T P P S S S S L H P L T P T P  
CAAACGCTGTCTTACCGTGTTAAGGAAGAGTTGTGTCCATCTTCTCCTTGCCAAGTCTCT  
Q T L S Y R V K E E L C P S S L P S P  
+1081 AAAGCCAAACAACCAAGAGTTGAGGTTAGATTAAGAGAAGGAAAGGCAGTGAACATACAC +380  
K G Q Q P R V E V R L R E G K A V N I H  
ATGTTCTGTGGACGTAGACCAGGCTTTTACTTTCCACCATGAGAGCTTTGGATAACTTA  
M F C G R R P G L L L S T M R A L D N L  
+1201 GGATTGGATGTTCAACAAGCGGTGATTAGCTGTTTCAATGGTTTTGCTTTGGATGTTTTTC +420  
G L D V Q Q A V I S C F N G F A L D V F  
CGCGCTGAGCAATGTCAAGAAGACCATGACGTGTACCTGAACAAATCAAAGCAGTGCTT  
R A E Q C Q E D H D V L P E Q I K A V L  
+1321 TTAGATACAGCAGGTTACGCTGGTTTTGGTTTTGA +450  
L D T A G Y A G L V \*

# C

ACCAA  
TACATTACACTAGCATCTGAATTTTATAACCAATCTCGATACACCAAATCGAATTC AATT  
CGGCGTTAATTCAGTACATTA AAAACGTC CGCAATGTGTTATTAAGTTGTCTAAGCGTCA  
-49 M C Y \*  
+1 **ATTTGTTTAC** ACCAAAATTCGAAACTTTTCCACTCTCTCTCTCTCTACTAGTTTGAC  
**ATGAACAGCGACGGTGTGGCTTGACGGCTCCGGTGAATCTCCGGAAGTTAATAACGGT**  
M N S D G V W L D G S G E S P E V N N G

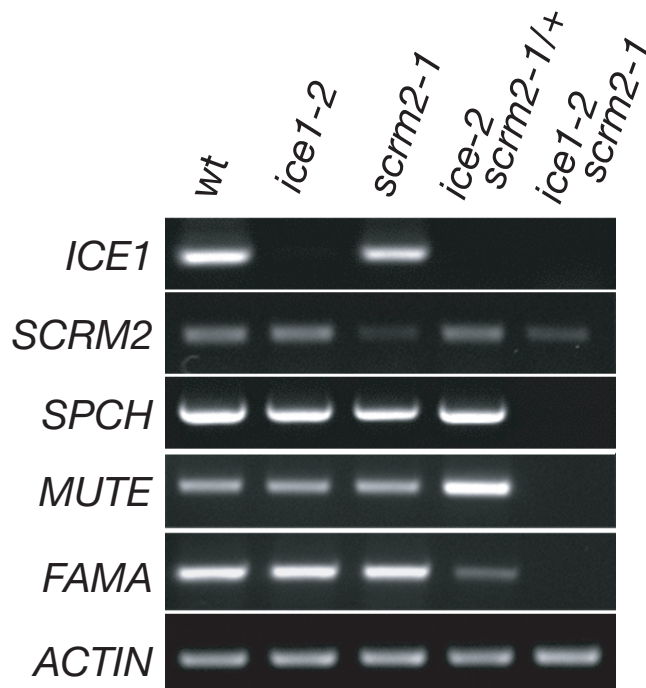

**Supplemental Figure 6.** RT-PCR analysis of *ICE1*, *SCRM2*, *SPCH*, *MUTE*, and *FAMA* transcript accumulation in wild-type (wt), *ice1-2*, *scrm2-1*, *ice1-2 scrm2-1/+*, and *ice1-2 scrm2-1* seedlings. Actin serves as a control. No *SPCH*, *MUTE*, or *FAMA* transcripts were detected in *ice1-2 scrm2-1* double mutant plants, consistent with the complete absence of stomatal cell lineage. In *ice1-2 scrm2-1/+*, *FAMA* transcripts were negligible in accordance with the absence of GMC formation. *MUTE* transcripts accumulated to higher levels in *ice1-2 scrm2-1/+*, which may reflect the increased numbers of meristemoids due to developmental arrest. *ice1-2* single mutation did not lead to significant change in transcript accumulation of other stomatal bHLH genes, consistent with the fact that only a small fraction of stomatal precursors form abnormal tumors.

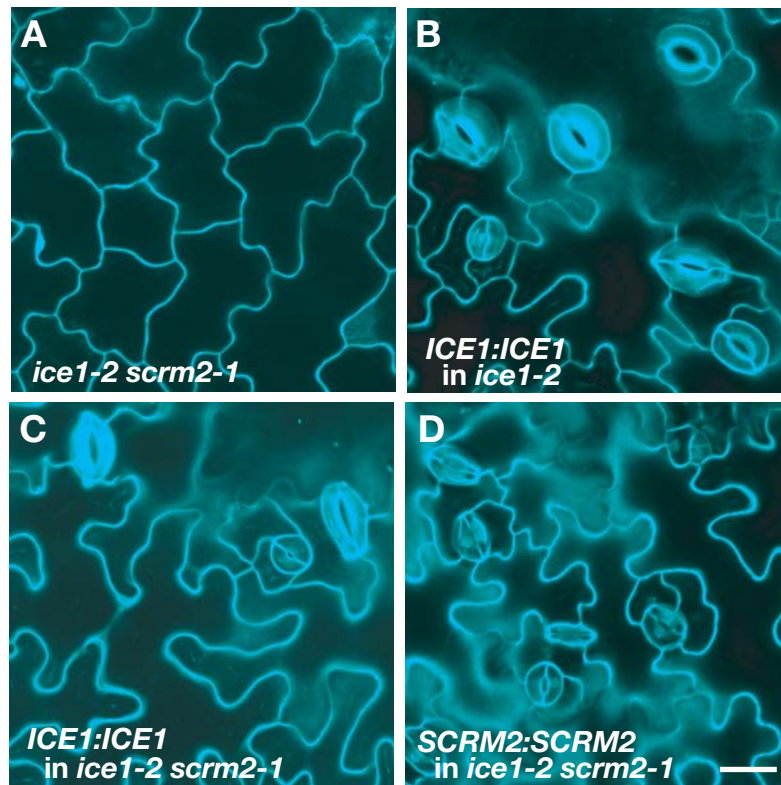

**Supplemental Figure 7.** Complementation of *ice1 scrm2* loss-of-function mutants by *ICE1* and *SCR2*. Shown are abaxial epidermis of rosette leaves. (A) *ice1-2 scrm2-1*. The complete loss of *ICE1* and *SCR2* results in the epidermis solely composed of pavement cells. (B) Transgenic *ice1-2* plant expressing pMK157, a full-length *ICE1* cDNA driven by its native promoter (*ICE1:ICE1*). *ICE1* is sufficient to rescue the ‘caterpillar-like’ tumors occasionally formed in *ice1-2*. (C) Transgenic *ice1-2 scrm2-1* plant expressing pMK157. Introduction of *ICE1* rescues the pavement cell-only phenotype in *ice1-2 scrm2-1*. (D) Transgenic *ice1-2 scrm2-1* plant expressing pMK181, a full-length *SCR2* cDNA driven by its native promoter (*SCR2:SCR2*). Introduction of *SCR2* rescues the pavement cell-only phenotype in *ice1-2 scrm2-1*. Scale bar, 20  $\mu$ m.



**Supplemental Table 1: List of primers and their DNA sequence used for genotype analysis**

| Mutant name | Type      | Restriction en      | Primer name   | Primer sequence                     |
|-------------|-----------|---------------------|---------------|-------------------------------------|
| tmm         | dCAPS     | Apo1<br>cuts mutant | TMM 960 dCAPS | AACGCGTTCAAAGGGCTCAAGAAATT          |
|             |           |                     | TMM 1254rc    | GAACCGAATGCATCATCCAAGTCACT          |
| mute        | dCAPS     | BslI<br>cuts WT     | MUTE dCAPs F  | TTCGTTCTTTGACTCCTTGTTTCTACCTCAAAG   |
|             |           |                     | MUTE dCAPs R  | CTTCGAGAAAATAATTAGGATTGTGAATTGAG    |
| spch        | T-DNA PCR |                     | SAIL_LB3      | TAGCATCTGAATTTTCATAACCAATCTCGATACAC |
| fama        | T-DNA PCR |                     | 53210 1281.rc | AACCTGAAGAATCTCAAGAGCC              |
|             |           |                     | SALK_LBa1     | TGGTTCACGTAGTGGGCCATCG              |
| scrm-D      | CAPS      | Nla3                | FAMA -609     | ATGTGTACCATTACACCC                  |
|             |           |                     | SCRMg429F     | CAAATCCATGCTCCTATTTTCGATGG          |
| ice1-2      | T-DNA PCR |                     | Chr3-9835011F | GTAAGTGTTTACTTTGCTGATCTTGG          |
|             |           |                     | SALK_003155RP | TGAGGAAGAGGCTCGTGATAG               |
| scrm2-1     | T-DNA PCR |                     | SALK_LBa1     | TGGTTCACGTAGTGGGCCATCG              |
|             |           |                     | SAIL808B10RP  | TAACTTCCGGAGATTCACCG                |
|             |           |                     | SAIL_LB1      | GCCTTTTCAGAAATGGATAAATAGCCTTGCTTCC  |

**Supplemental Table 2: List of primers and their DNA sequence used for map-based cloning of *SCRM***

| Marker name | Chrc | Location (k | Type | Restrictic Col bands (t | Ler bands (t  | Forward primer                     | Reverse primer                  |
|-------------|------|-------------|------|-------------------------|---------------|------------------------------------|---------------------------------|
| KTL1.100    | 1    | 3200        | SSLP |                         | 630           | 460 AAGACTCCATCTTGACACTGTTATGC     | CTCAGAAAGGAAAAACGCACAGTAGC      |
| KTL1.120    | 1    | 11000       | SSLP |                         | 820           | 600 CTTTACCCCTCCACGATTTTTAAGCAATGG | GAGCAAAAATTAACATCAGTGACATGACC   |
| KTL1.130    | 1    | 23000       | SSLP |                         | 780           | 500 GACAACAAAACCCCTGTTGTTCTGAGC    | TCCTCTAGTCATTTCTCATAAGATCCAC    |
| MSAT2.36    | 2    | 8827        | SSLP |                         | 158           | 200 GATCTGCCTCTTGATCAGC            | CCAAGAAGCTCAAAACCGTT            |
| MSAT2.9     | 2    | 18295       | SSLP |                         | 173           | 135 TAAAAGAGTCCCTCGTAAAG           | GTTGTTGTTGTTGGCATT              |
| KTL4.100    | 4    | 7200        | SSLP |                         | 700           | 440 GACCAAGCTTCGTTATCGAAGATAACC    | AAAGAGAAGCTCACCGGCATACC         |
| KTL4.120    | 4    | 16800       | SSLP |                         | 795           | 550 TAATTTGTCTCCCTGTGTTAACTTGC     | GTAGGTAACGAGATCCAGATCTTCC       |
| KTL5.100    | 5    | 7600        | SSLP |                         | 815           | 435 GTTTTTATTGGTGGTGTGAGAGGAATGG   | TATCTCTTGTGTTGTGAGTGTGTTGG      |
| KTL5.120    | 5    | 16800       | SSLP |                         | 830           | 430 TTTGGTGGACCATAGAGATTGATTGG     | CTTTGTACTTTTACTCGGTTGATGACG     |
| KTL5.130    | 5    | 25000       | SSLP |                         | 750           | 530 ATACTGTGCGACTTCAGGTTCTACTCC    | GCAAACCTATAATCTCAGCTTGGTTCAGG   |
| KTL3.110    | 3    | 2400        | SSLP |                         | 780           | 460 ACGTGCTCTCTGGTTCATCTATATATCC   | AGTATTGAATCCGTCAAAAGCTGTGC      |
| KTL3.120    | 3    | 9100        | SSLP |                         | 670           | 510 ATGAGTTTAGATCATCAAGATCGGAGG    | CCAACCGAAATGAACCAAAAACCATCG     |
| KTL3.130    | 3    | 9250        | SSLP |                         | 247           | 220 ATAGTTCTGGTTCACCTTACAGAACCC    | CGCAACAATTACAGGTCATAAACC        |
| KTL3.140    | 3    | 9400        | SSLP |                         | 1197          | 409 GCTTTTTATGTTTCATAAGACTTGAAGC   | GACTCAACGCAATTTGAGGTTTTCG       |
| KTL3.150    | 3    | 9540        | SSLP |                         | 240           | 199 TGGAAGGAGAAACATCTTTCTAGG       | CCAGATGTGACCTTTTGAAGCTTTGC      |
| KTL3.160    | 3    | 9570        | SSLP |                         | 213           | 191 AGATTACACTTATTGTTGCCTTATCG     | GTCAAAATAGCCAAAATATTCAAAAATAGG  |
| KTL3.170    | 3    | 9620        | SSLP |                         | 213           | 240 GGACAAAAGATTTCAGCAACCTTCG      | TTAGCAGCATACGGAATTAGTTACG       |
| KTL3.180    | 3    | 9640        | SSLP |                         | 272           | 234 AACACAGAGCTTCTCAACTCTTTTCC     | TCGTAGTTTCTCTCGGATACAGC         |
| KTL3.190    | 3    | 9680        | CAPS | Pst1                    | 738           | 738 TCAGACTCACGAGAATACAAAAGTGC     | AATTCGGATTTGGGAGTTCCTCTGC       |
| KTL3.200    | 3    | 9705        | SSLP |                         | 171           | 155 TTACAAAATCTACGCAACGCAATGG      | AGGAGCAACTAGCGATGGTGG           |
| KTL3.210    | 3    | 9776        | CAPS | Mbo1                    | 460 226, 234  | TGTAAGTGTGAGCGATTAATGCTACC         | GCAATCCCAAGCCATTTAAGTTTCC       |
| KTL3.220    | 3    | 9786        | SSLP |                         | 140           | 155 GACAGAGGTGATCAGCTGAACC         | CACTTTGCCAATTCGTTATCTTTGG       |
| KTL3.230    | 3    | 9791        | CAPS | Xho1                    | 933 590, 343  | CTCTGCATTTTCGTTCCGATTGC            | GAACCCGTTTGATCGATATGTATAGC      |
| KTL3.240    | 3    | 9820        | CAPS | Mfe1                    | 598, 375      | 973 GCAACTTCTTACTGATACCAACG        | ATGTCCATTTGTCTTCATGGTGG         |
| KTL3.250    | 3    | 9830        | SSLP |                         | 1102          | 414 TCTACAAGTCTTTGTAACCACTCC       | ACAAAACGAACATTGCCAAAACG         |
| KTL3.260    | 3    | 9847        | CAPS | Nco1                    | 179, 314      | 493 CTTGAATGAGTTATGGCATGGTCAGG     | ACCTAGCCGGAATCATAAACCCTAGC      |
| KTL3.270    | 3    | 9862        | SSLP |                         | 1032          | 771 GTCACACTGGTAATTTGACAAAATCC     | CAGCACTAAGAACTGAAAGAAGTGC       |
| KTL3.280    | 3    | 9960        | SSLP |                         | 158           | 144 CGAATGATGCTATATTGGTTAATTCTGG   | TTATTAATGTCTCTTTCTATAGGTCTAAG   |
| KTL3.290    | 3    | 10010       | CAPS | Mbo1                    | 240, 491      | 731 GCTGCATCTTCACGAAGAGTTTTGG      | GTATTGGGAGGAGTCTAAACGTTGC       |
| KTL3.300    | 3    | 10030       | SSLP |                         | 243           | 221 GTTCCACTATATAACCACGCTCTCG      | ACGAGATCATGATACGTGTCAGTG        |
| KTL3.310    | 3    | 10160       | SSLP |                         | 157           | 143 GTAGTTAATGAGCTTTAGGAGTGTG      | AAGCTTTGATTAAGTAAATATGGTTTCATAC |
| KTL3.320    | 3    | 10270       | CAPS | Xba1                    | 1083 715, 368 | TCATCTCTATGGATGAAACAATCC           | GCATTGCATATTTGTACTTCTCTACC      |
| KTL3.330    | 3    | 10300       | SSLP |                         | 200           | 176 AATGTGGTGATGTAGCAACCACTGG      | CTTTCTCTCACTCTCTTCTAAATGG       |
| KTL3.340    | 3    | 10400       | SSLP |                         | 251           | 232 AGCTGGAGGATTAGTCCGATGC         | CGTTTACTGTTTACCTTTATCGTTTGC     |
| KTL3.350    | 3    | 10700       | SSLP |                         | 230           | 201 GACCATGAGATTGAAATAACTTACAGC    | TTGGAATAATCTTGACAGTAAACAAGG     |
| KTL3.360    | 3    | 11000       | SSLP |                         | 885           | 343 AGATTTCCAAGCTGAGGTGACG         | ACGATTGACTTGTACGTGTCACG         |
| KTL3.370    | 3    | 11400       | SSLP |                         | 872           | 573 CAGAGATAGGCCATTGTGACG          | TTTTCGTTTTGTCGGGAGTTGAGG        |
| KTL3.380    | 3    | 11800       | SSLP |                         | 1564          | 422 GGATGAAGATTTGTTGACTCAAGG       | GGTTTAACCAACGAGCTGAAAGC         |
| KTL3.390    | 3    | 12300       | SSLP |                         | 1280          | 415 TAACATTAGCAGCAACTGGACTTGG      | AGCCGGTACAACAACCTAGAAAACG       |
| KTL3.035    | 3    | 12560       | SSLP |                         | 257           | 200 TGGTTGTTACAATTTGCACTC          | GTGGAGAAGAACAAGAGTGTG           |
| KTL3.400    | 3    | 17000       | SSLP |                         | 930           | 530 CACCGAGTTTTGCTTTGTTTCTTTTGC    | GTGAGATCCGACGAAGAGTTTACC        |

Supplemental Table S3: List of plasmids constructed in this study and their description

|                  | plasmid ID                                               | description                                              | insert                                         | vector              | process             | PCR primer forward1  | PCR primer reverse1 | PCR primer for PCR primer re | restriction enzymes |
|------------------|----------------------------------------------------------|----------------------------------------------------------|------------------------------------------------|---------------------|---------------------|----------------------|---------------------|------------------------------|---------------------|
| Yeast Two Hybrid | pMK151                                                   | ICE1-cDNA in pCR17                                       | ICE1 cDNA                                      | pGBKT7              | PCR, ligation       | SCR1M1-EcoRI/F       | SCR1MendBanH1.c     |                              | EcoRI, BanH1        |
|                  | pMK152                                                   | ICE1-cDNA in pGADT7                                      | ICE1 cDNA                                      | pGADT7              | PCR, ligation       | SCR1M1-EcoRI/F       | SCR1MendBanH1.c     |                              | EcoRI, BanH1        |
|                  | pMK153                                                   | scrm-D-cDNA in pGBKT7                                    | scrm-D cDNA                                    | pGBKT7              | PCR, ligation       | SCR1M1-EcoRI/F       | SCR1MendBanH1.c     |                              | EcoRI, BanH1        |
|                  | pMK154                                                   | scrm-D-cDNA in pGADT7                                    | scrm-D cDNA                                    | pGADT7              | PCR, ligation       | SCR1M1-EcoRI/F       | SCR1MendBanH1.c     |                              | EcoRI, BanH1        |
|                  | pNLB101                                                  | MUTE cDNA in pCR1-TOPO                                   | MUTE cDNA                                      | pCR1-TOPO           | PCR, TOPO cloning   | MUTE1-EcoRI linker   | MUTE09 BanH1.c      |                              | EcoRI, BanH1        |
|                  | pNLB103                                                  | SPCH cDNA in pCR1-TOPO                                   | SPCH cDNA                                      | pCR1-TOPO           | PCR, TOPO cloning   | 53210_1-EcoRI linker | 53210_1099 BanH1.c  |                              | EcoRI, BanH1        |
|                  | pNLB104                                                  | FAMA cDNA in pCR1-TOPO                                   | FAMA cDNA                                      | pCR1-TOPO           | PCR, TOPO cloning   | FAMA1-EcoRI linker   | FAMA_1244 BanH1.c   |                              | EcoRI, BanH1        |
|                  | pNLB105                                                  | MUTE cDNA in pGBKT7                                      | MUTE cDNA                                      | pGBKT7              | PCR, ligation       |                      |                     |                              | EcoRI, BanH1        |
|                  | pNLB106                                                  | SPCH cDNA in pGBKT7                                      | SPCH cDNA                                      | pGBKT7              | PCR, ligation       |                      |                     |                              | EcoRI, BanH1        |
|                  | pNLB107                                                  | FAMA cDNA in pGBKT7                                      | FAMA cDNA                                      | pGBKT7              | PCR, ligation       |                      |                     |                              | EcoRI, BanH1        |
|                  | pNLB108                                                  | MUTE cDNA in pGADT7                                      | MUTE cDNA                                      | pGADT7              | PCR, ligation       |                      |                     |                              | EcoRI, BanH1        |
| pNLB109          | SPCH cDNA in pGADT7                                      | SPCH cDNA                                                | pGADT7                                         | PCR, ligation       |                     |                      |                     | EcoRI, BanH1                 |                     |
| pNLB110          | FAMA cDNA in pGADT7                                      | FAMA cDNA                                                | pGADT7                                         | PCR, ligation       |                     |                      |                     | EcoRI, BanH1                 |                     |
| ICE1             | pMK142                                                   | ICE1 genomic in pENTR                                    | ICE1 genomic                                   | pENTR-TOPO          | PCR, TOPO cloning   | SCR1MendGW           | SCR1MendSTOP.c      |                              |                     |
|                  | pMK143                                                   | ICE1 <sub>1-1000</sub> genomic in pENTR                  | ICE1 <sub>1-1000</sub> genomic                 | pENTR-TOPO          | PCR, TOPO cloning   | SCR1MendGW           | SCR1MendSTOP.c      |                              |                     |
|                  | pMK144                                                   | ICE1 promoter in pCR2.1                                  | ICE1 promoter                                  | pCR2.1              | PCR, TA cloning     | SCR1MendGW           | SCR1MendSTOP.c      |                              |                     |
|                  | pMK145                                                   | ICE1 <sub>1-1000</sub> -NotI in pMDC99                   | ICE1 <sub>1-1000</sub> -NotI                   | pMDC99              | ligation            | SCR1Mprom-25815B1F   | SCR1Mprom-1Kp1R.c   |                              |                     |
|                  | pMK155                                                   | GFP-ICE1 in pENTR                                        | GFP-ICE1                                       | pMDC99              | PCR, ligation       | NotI/GFP.F           | GFPProsto-NotI.R.c  |                              | Sbf1, NotI          |
|                  | pMK156                                                   | GFP-ICE1 <sub>1-1000</sub> in pENTR                      | GFP-ICE1 <sub>1-1000</sub>                     | pMDC99              | PCR, ligation       | NotI/GFP.F           | GFPProsto-NotI.R.c  |                              | NotI                |
|                  | pMK157                                                   | ICE1 <sub>1-1000</sub> -NotI in pMDC99                   | ICE1 <sub>1-1000</sub> -NotI                   | pMDC99              | GATEWAY LR reaction |                      |                     |                              |                     |
|                  | pMK158                                                   | ICE1 <sub>1-1000</sub> -NotI in pMDC99                   | ICE1 <sub>1-1000</sub> -NotI                   | pMDC99              | GATEWAY LR reaction |                      |                     |                              |                     |
|                  | pMK162                                                   | ICE1-GFP-ICE1 <sub>1-1000</sub> -NotI in pMDC99          | ICE1-GFP-ICE1 <sub>1-1000</sub> -NotI          | pMDC99              | GATEWAY LR reaction |                      |                     |                              |                     |
|                  | pMK163                                                   | ICE1-GFP-ICE1-NotI in pMDC99                             | ICE1-GFP-ICE1-NotI                             | pMDC99              | GATEWAY LR reaction |                      |                     |                              |                     |
|                  | pMK171                                                   | ICE1 <sub>1-1000</sub> in pENTR                          | ICE1 <sub>1-1000</sub>                         | pENTR-TOPO          | PCR, TOPO cloning   | SCR1MendGW           | SCR1MendSTOP.c      |                              |                     |
| pMK172           | ICE1 <sub>1-1000</sub> genomic E3120 mutation in pENTR   | ICE1 <sub>1-1000</sub> genomic E3120 mutation            | pENTR-TOPO                                     | PCR, TOPO cloning   | SCR1MendGW          | SCR1MendSTOP.c       |                     |                              |                     |
| pMK173           | ICE1 <sub>1-1000</sub> -NotI in pMDC99                   | ICE1 <sub>1-1000</sub> -NotI                             | pMDC99                                         | GATEWAY LR reaction |                     |                      |                     |                              |                     |
| pMK174           | ICE1 <sub>1-1000</sub> -NotI in pMDC99                   | ICE1 <sub>1-1000</sub> -NotI                             | pMDC99                                         | GATEWAY LR reaction |                     |                      |                     |                              |                     |
| SCR2             | pMK147                                                   | SCR2 <sub>2300</sub> genomic in pENTR                    | SCR2 <sub>2300</sub> genomic                   | pENTR-TOPO          | PCR, TOPO cloning   | At1g12860gGenGW      | At1g12860gGenSTOP.c |                              |                     |
|                  | pMK178                                                   | SCR2 <sub>2300</sub> genomic in pENTR                    | SCR2 <sub>2300</sub> genomic                   | pENTR-TOPO          | PCR, TOPO cloning   | At1g12860gGenGW      | At1g12860gGenSTOP.c |                              |                     |
|                  | pMK176                                                   | SCR2 <sub>2300</sub> genomic 3600 to 2300 in pCR2.1      | SCR2 <sub>2300</sub> genomic 3600 to 2300      | pCR2.1              | PCR, TA cloning     | ICE2prom-13283B1F    | ICE2prom-1Kp1R.c    |                              |                     |
|                  | pMK180                                                   | SCR2 <sub>2300</sub> genomic 3600 to 2300-NotI in pMDC99 | SCR2 <sub>2300</sub> genomic 3600 to 2300-NotI | pMDC99              | ligation            | SCR1Mprom-25815B1F   | SCR1Mprom-1Kp1R.c   |                              |                     |
|                  | pMK181                                                   | SCR2 <sub>2300</sub> genomic 3600 to 2300-NotI in pMDC99 | SCR2 <sub>2300</sub> genomic 3600 to 2300-NotI | pMDC99              | ligation            | SCR1Mprom-25815B1F   | SCR1Mprom-1Kp1R.c   |                              |                     |
| pMK185           | SCR2 <sub>2300</sub> genomic 3600 to 2300-NotI in pMDC99 | SCR2 <sub>2300</sub> genomic 3600 to 2300-NotI           | pMDC99                                         | GATEWAY LR reaction |                     |                      |                     |                              |                     |
| SpiriYFP         | pMK128                                                   | ICE1-cDNA                                                | ICE1-cDNA                                      | pENTR-TOPO          | PCR, TOPO cloning   | SCR1MendGW           | SCR1MendSTOP.c      |                              |                     |
|                  | pMK130                                                   | scrm-D cDNA in pENTR                                     | scrm-D cDNA                                    | pENTR-TOPO          | PCR, TOPO cloning   | SCR1MendGW           | SCR1MendSTOP.c      |                              |                     |
|                  | pMK132                                                   | ICE1-cDNA (pMK128)                                       | ICE1-cDNA (pMK128)                             | pENTR-TOPO          | PCR, TOPO cloning   | SCR1MendGW           | SCR1MendSTOP.c      |                              |                     |
|                  | pMK133                                                   | dual 35S <sub>prom</sub> :-(17S-end)YFP-ICE1 in pE3130   | dual 35S <sub>prom</sub> :-(17S-end)YFP-ICE1   | pE3130              | GATEWAY LR reaction |                      |                     |                              |                     |
|                  | pMK136                                                   | dual 35S <sub>prom</sub> :-(17S-end)YFP-scrm-D in pE3130 | dual 35S <sub>prom</sub> :-(17S-end)YFP-scrm-D | pE3130              | GATEWAY LR reaction |                      |                     |                              |                     |
|                  | pMK137                                                   | dual 35S <sub>prom</sub> :-(17S-end)YFP-scrm-D in pE3132 | dual 35S <sub>prom</sub> :-(17S-end)YFP-scrm-D | pE3132              | GATEWAY LR reaction |                      |                     |                              |                     |
|                  | pMK217                                                   | SCR2-cDNA in pENTR                                       | SCR2-cDNA                                      | pENTR-TOPO          | PCR, TOPO cloning   | SCR1MendGW           | SCR1MendSTOP.c      |                              |                     |
|                  | pMK213                                                   | dual 35S <sub>prom</sub> :-(17S-end)YFP-SCR2 in pE3136   | dual 35S <sub>prom</sub> :-(17S-end)YFP-SCR2   | pE3136              | GATEWAY LR reaction |                      |                     |                              |                     |
|                  | pMK214                                                   | dual 35S <sub>prom</sub> :-(17S-end)YFP-SCR2 in pE3130   | dual 35S <sub>prom</sub> :-(17S-end)YFP-SCR2   | pE3130              | GATEWAY LR reaction |                      |                     |                              |                     |
|                  | pLJP173                                                  | dual 35S <sub>prom</sub> :-(17S-end)YFP-MUTE in pE3136   | dual 35S <sub>prom</sub> :-(17S-end)YFP-MUTE   | pE3136              | GATEWAY LR reaction |                      |                     |                              |                     |
|                  | pLJP174                                                  | dual 35S <sub>prom</sub> :-(17S-end)YFP-MUTE in pE3130   | dual 35S <sub>prom</sub> :-(17S-end)YFP-MUTE   | pE3130              | GATEWAY LR reaction |                      |                     |                              |                     |
|                  | pLJP175                                                  | dual 35S <sub>prom</sub> :-(17S-end)YFP-FAMA in pE3136   | dual 35S <sub>prom</sub> :-(17S-end)YFP-FAMA   | pE3136              | GATEWAY LR reaction |                      |                     |                              |                     |
|                  | pLJP176                                                  | dual 35S <sub>prom</sub> :-(17S-end)YFP-FAMA in pE3130   | dual 35S <sub>prom</sub> :-(17S-end)YFP-FAMA   | pE3130              | GATEWAY LR reaction |                      |                     |                              |                     |
|                  | pLJP224                                                  | SCR2 <sub>2300</sub> genomic 3600 to 2300-NotI in pGWB4  | SCR2 <sub>2300</sub> genomic 3600 to 2300-NotI | pGWB4               | GATEWAY LR reaction |                      |                     |                              |                     |
|                  | pLJP226                                                  | dual 35S <sub>prom</sub> :-(17S-end)YFP-SPCH in pE3136   | dual 35S <sub>prom</sub> :-(17S-end)YFP-SPCH   | pE3136              | GATEWAY LR reaction |                      |                     |                              |                     |
|                  | pLJP227                                                  | dual 35S <sub>prom</sub> :-(17S-end)YFP-SPCH in pE3130   | dual 35S <sub>prom</sub> :-(17S-end)YFP-SPCH   | pE3130              | GATEWAY LR reaction |                      |                     |                              |                     |

**Supplemental Table 4: List of primers and their DNA sequence used for plasmid construction**

|                       |                                     |
|-----------------------|-------------------------------------|
| SCRM1-EcoR1F          | TGTCAGAATTCGCGATGGGTCTTGACG         |
| SCRM3endBamH1.rc      | AGTCAGGATCCGATCAGATCATACC           |
| SCRM5endGW            | CACCATGGGTCTTGACGGAAACAATGG         |
| SCRM3endSTOP.rc       | TCAGATCATACCAGCATAACCCTGC           |
| SCRMprom-2581Sbf1F    | AAGCCTGCAGGACCACCGTCAATAACATCG      |
| SCRMprom-1Kpn1R.rc    | AGAGGTACCGCCAAAGTTGACACC            |
| Not1GFP-F             | GCTAGCGGCCGCCACCATGGTGAGC           |
| GFPnostop-Not1R.rc    | AGCGGCAGCGGCCGCAGCTCC               |
| SCRM-DBDmutationsF    | CCTCTGATGGCTGGGAGGAGAAGGGGAAGAAG    |
| SCRM-DBDmutationsR.rc | CCCTTCTCCTCCCAGCCATCAGAGGCTTAGCAG   |
| At1g12860g5endGW      | CACCATGGAGAGTAGAGAGGATTCATTC        |
| At1g12860g3endSTOP.rc | TCAAACCAAACCAGCGTAACCTGC            |
| ICE2prom-1326Sbf1F    | GGTCCTGCAGGTTTTCATGAGCTTCC          |
| ICE2prom-1Kpn1.rc     | TACTCTGGTACCCACTTTTATAAAATACTAG     |
| ICE2R581HmutationF    | CAACTCTGTTTCAGAAACATGCTGCAATGCGTCAG |
| ICE2R581HmutationR.rc | CTGACGCATTGCAGCATGTTTCTGAAACAGAGTTG |
| ICE2g5endEcoR1GWF     | CACCGAATTCATGAACAGCGACGGTGTTTGG     |
| MUTE1-EcoRI linker    | CGGAATTCATGTCTCACATCGCTGTTGAA       |
| MUTE609 BamH1.rc      | CGGGATCCTTAATTGGTAGAGACGATCAC       |
| 53210_1-EcoRI linker  | CGGAATTCATGCAGGAGATAATACCGGAT       |
| 53210_1095 BamH1.rc   | CGGGATCCCTAGCAGAATGTTTGCTGAAT       |
| FAMA1-EcoRI linker    | CGGAATTCATGGATAAAGATTACTCGGCA       |
| FAMA 1244 BamH1.rc    | CGGGATCCTCAAGTAAACACAATATTTCCC      |

**Supplemental Table 5: List of primers and their DNA sequence used for RT-PCR and 5' RACE PCR analysis**

| Gene  | Primer name         | Sequence                  |
|-------|---------------------|---------------------------|
| ICE1  | SCRM 1209F          | GGAGATGCAATTGATTATCTGAAGG |
|       | SCRM 3'END BAMH1.RC | AGTCAGGATCCGATCAGATCATACC |
| SCRM2 | SCRM2 2784          | CACACTCGACGCTGCTTCAC      |
|       | SCRM2 3110.rc       | GAAGCCATTACCTGTAACGG      |
| SPCH  | 53210 1.GW          | CACCATGCAGGAGATAATACCG    |
|       | 53210 886.rc        | CTAGCAGAATGTTTGCTG        |
| MUTE  | MUTE 1.GW           | CACCATGTCTCACATCGCTGTTG   |
|       | MUTE 1486.rc        | TTAATTGGTAGAGACGATC       |
| FAMA  | FAMA 1.GW           | CACCATGGATAAAGATTACTCGG   |
|       | FAMA 799.rc         | AGGCATGAGAGATCTAAGG       |
| ACTIN | ACT2-1              | GCCATCCAAGCTGTTCTCTC      |
|       | ACT2-2              | GTCGTAGTCAACAGCAACAA      |

**5' RACE PCR of SCRM2**

|                       |                          |
|-----------------------|--------------------------|
| reverse primer        | ACCCAAGACGCAGCTTCACCGTTA |
| reverse nested primer | AGCCGTCAAGCCAAACAC       |
